# Supplementary material
Source: publisher figshare collection journal article supplement (https://geolsoc.figshare.com/ndownloader/files/13574357)

**SG-04 Vertisol**


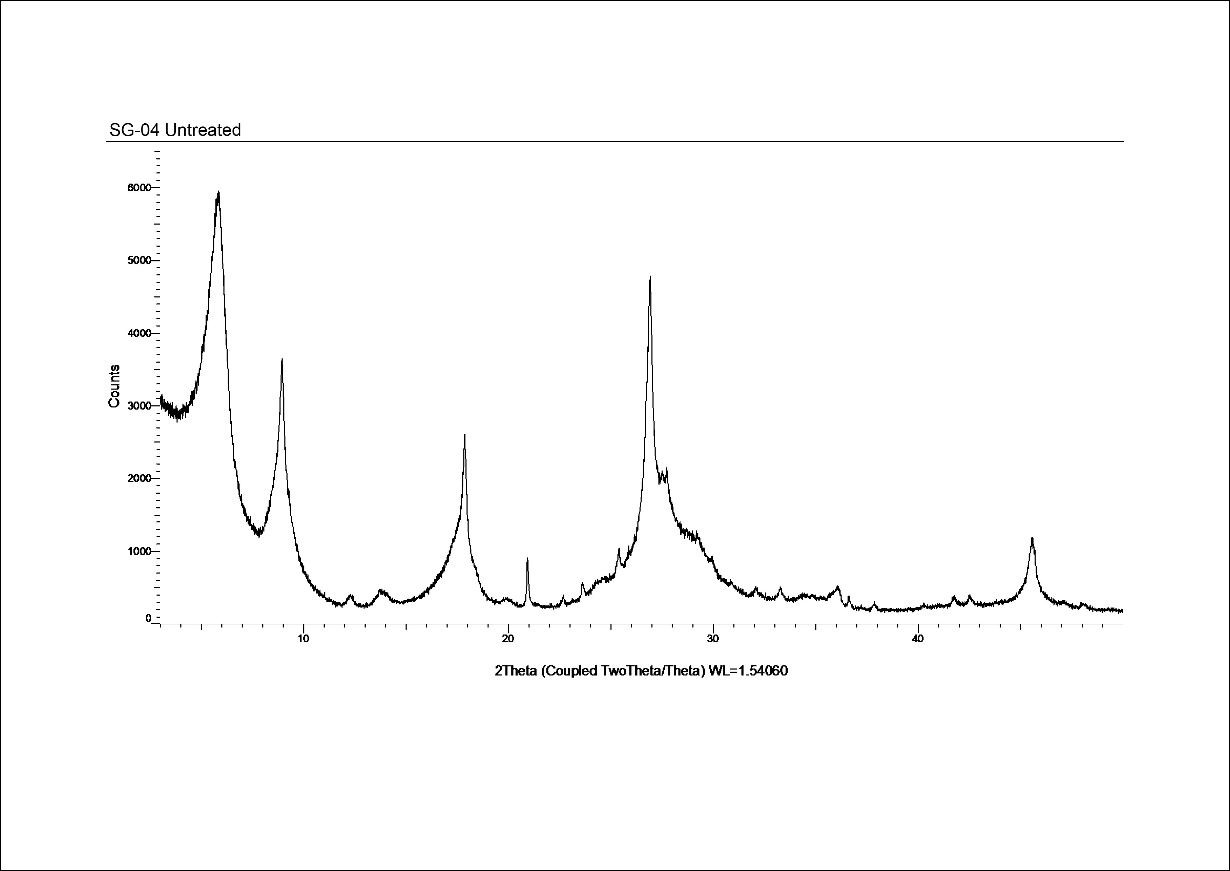


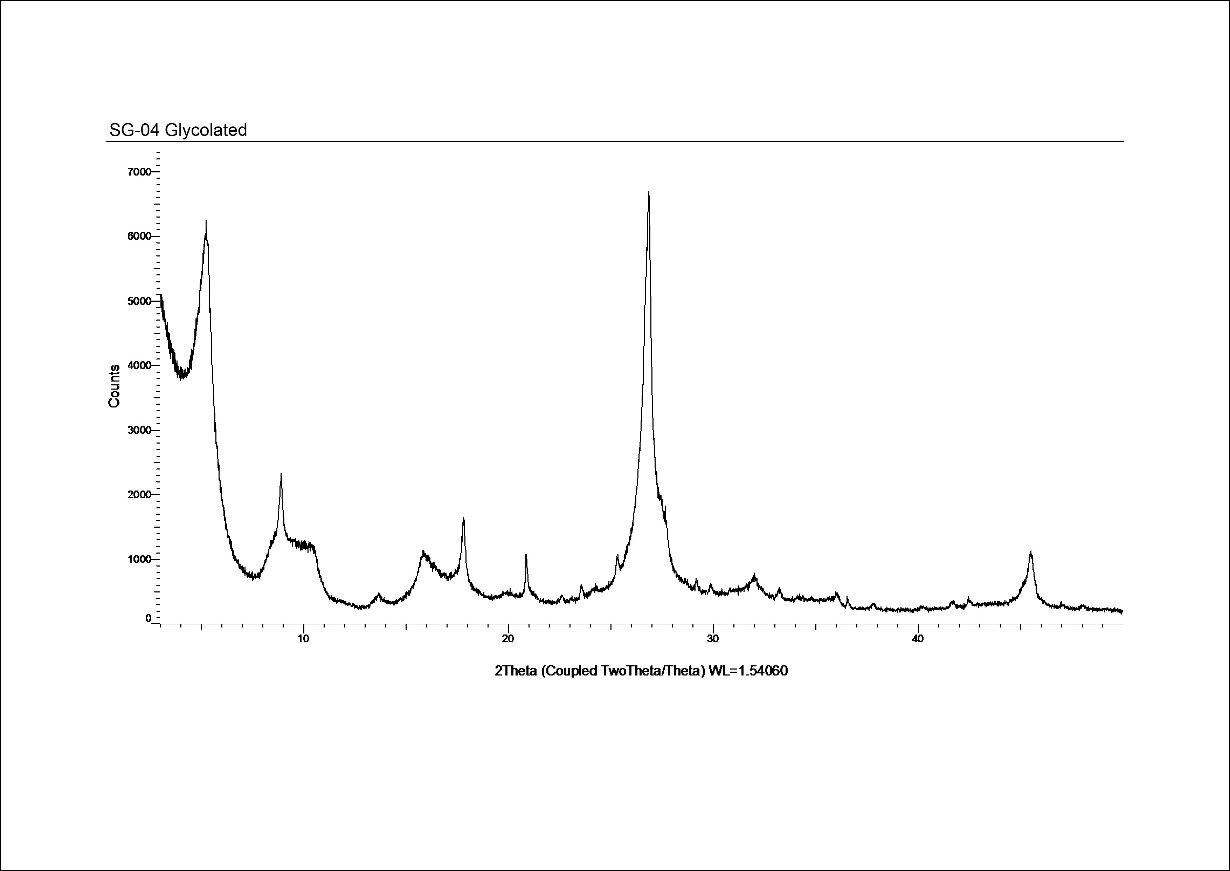


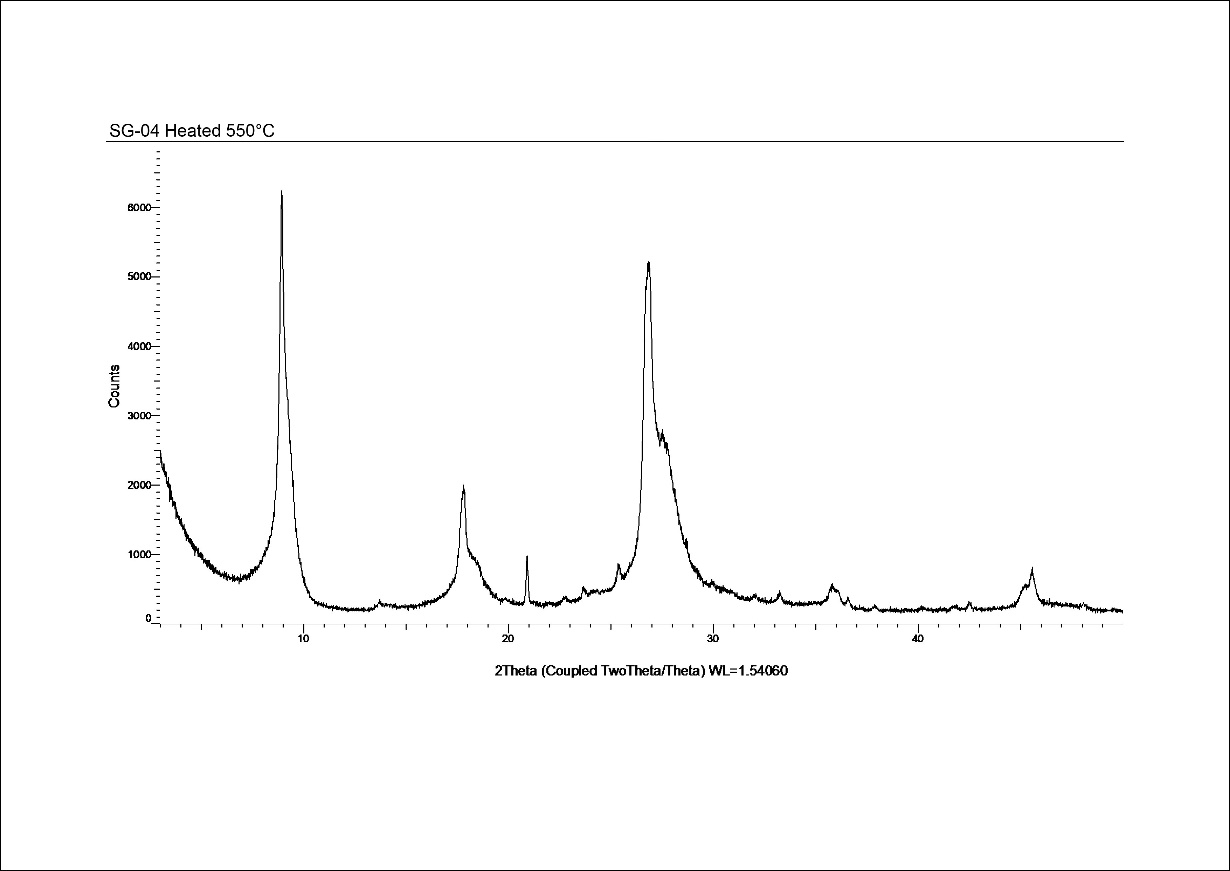


**SG-06 Vertisol**


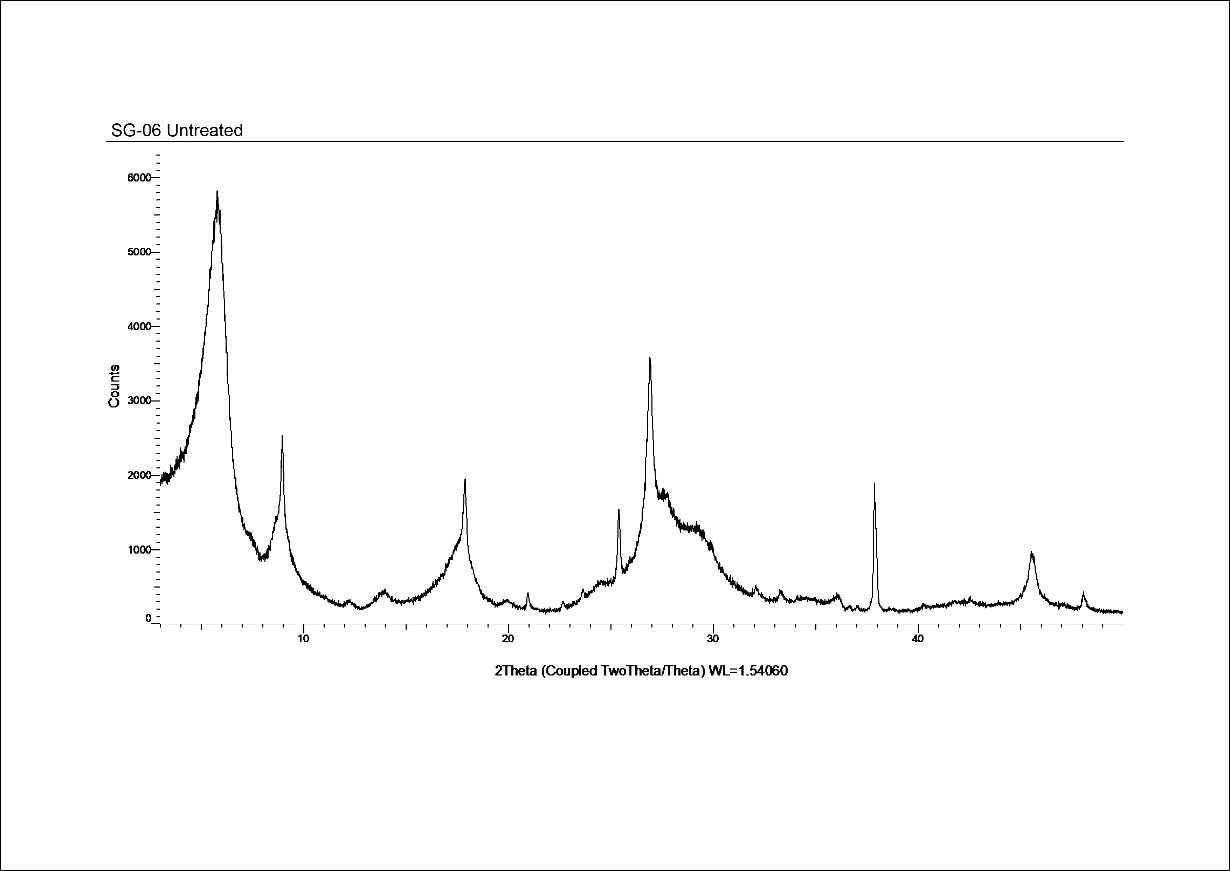


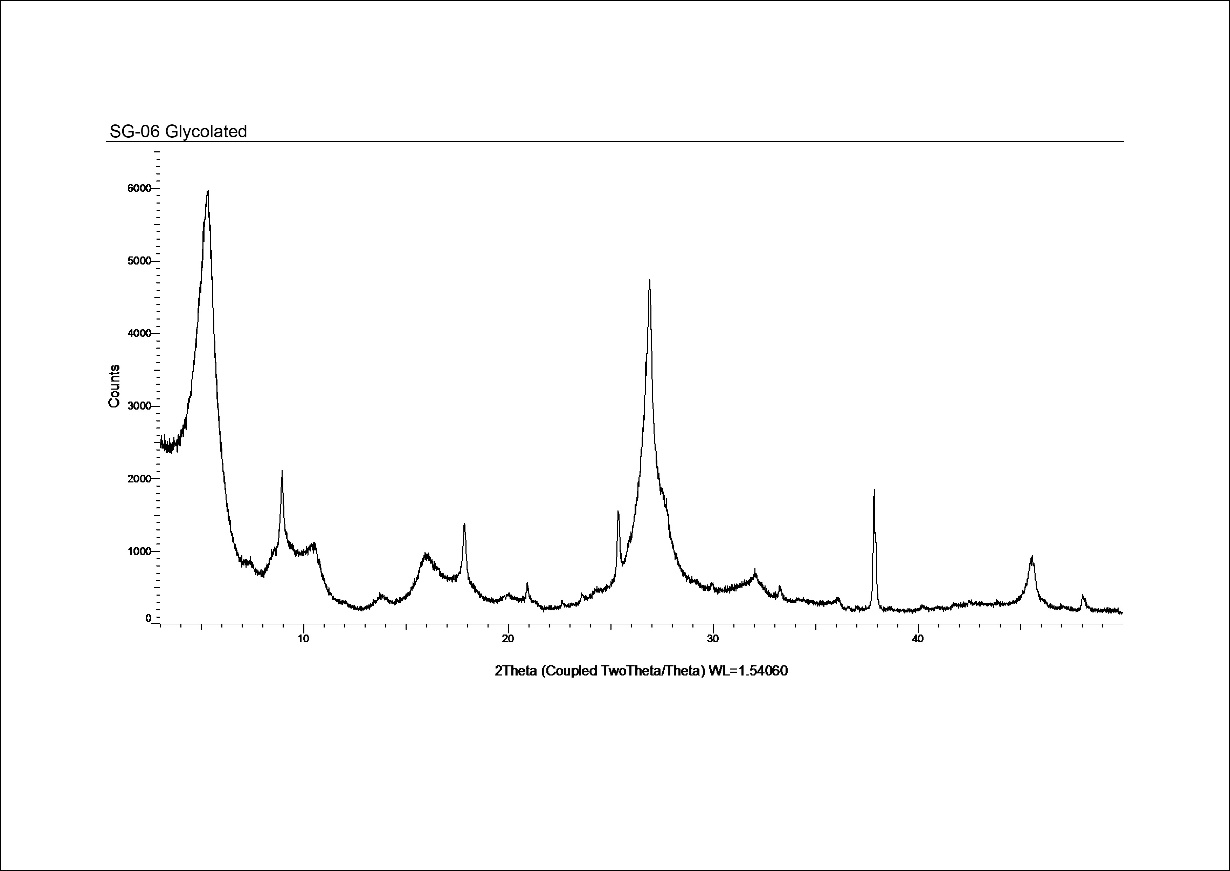


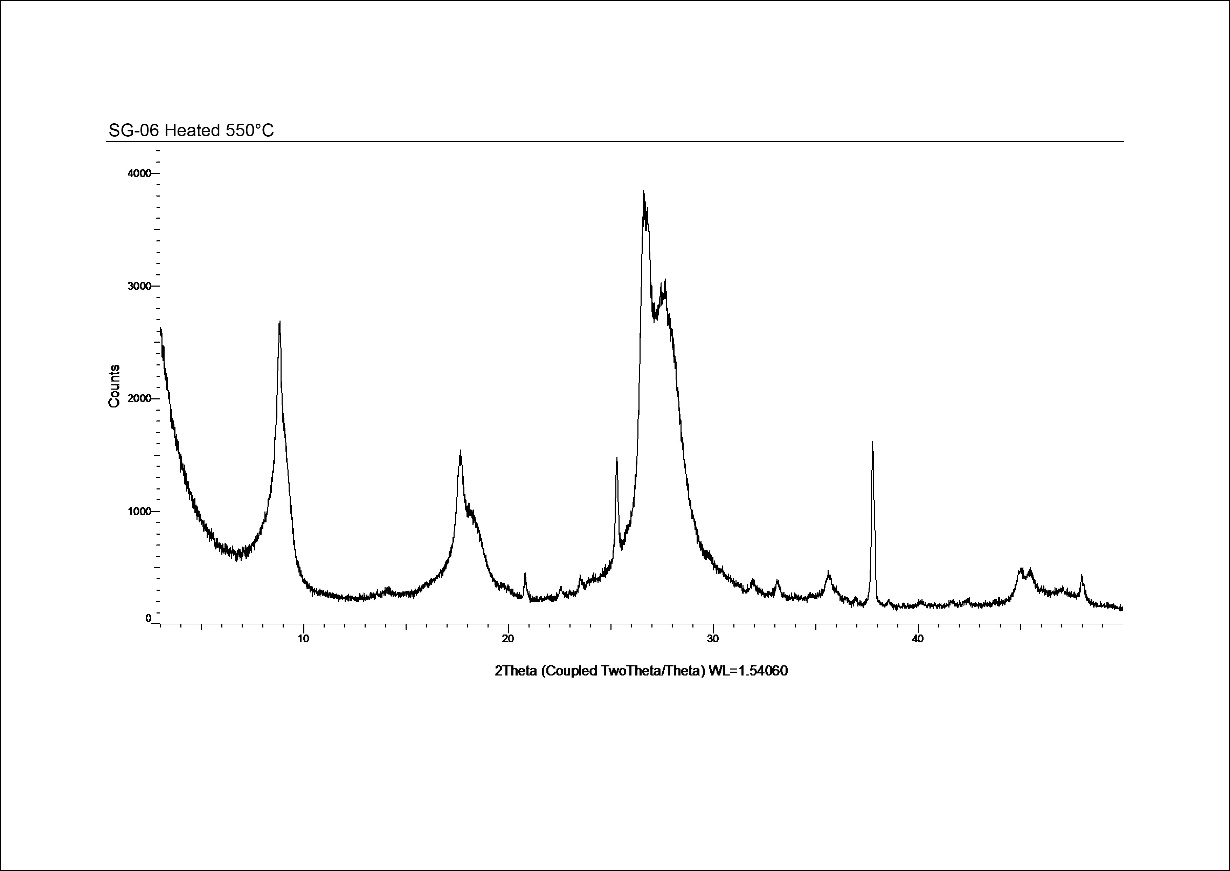


**SG-10 Vertisol**


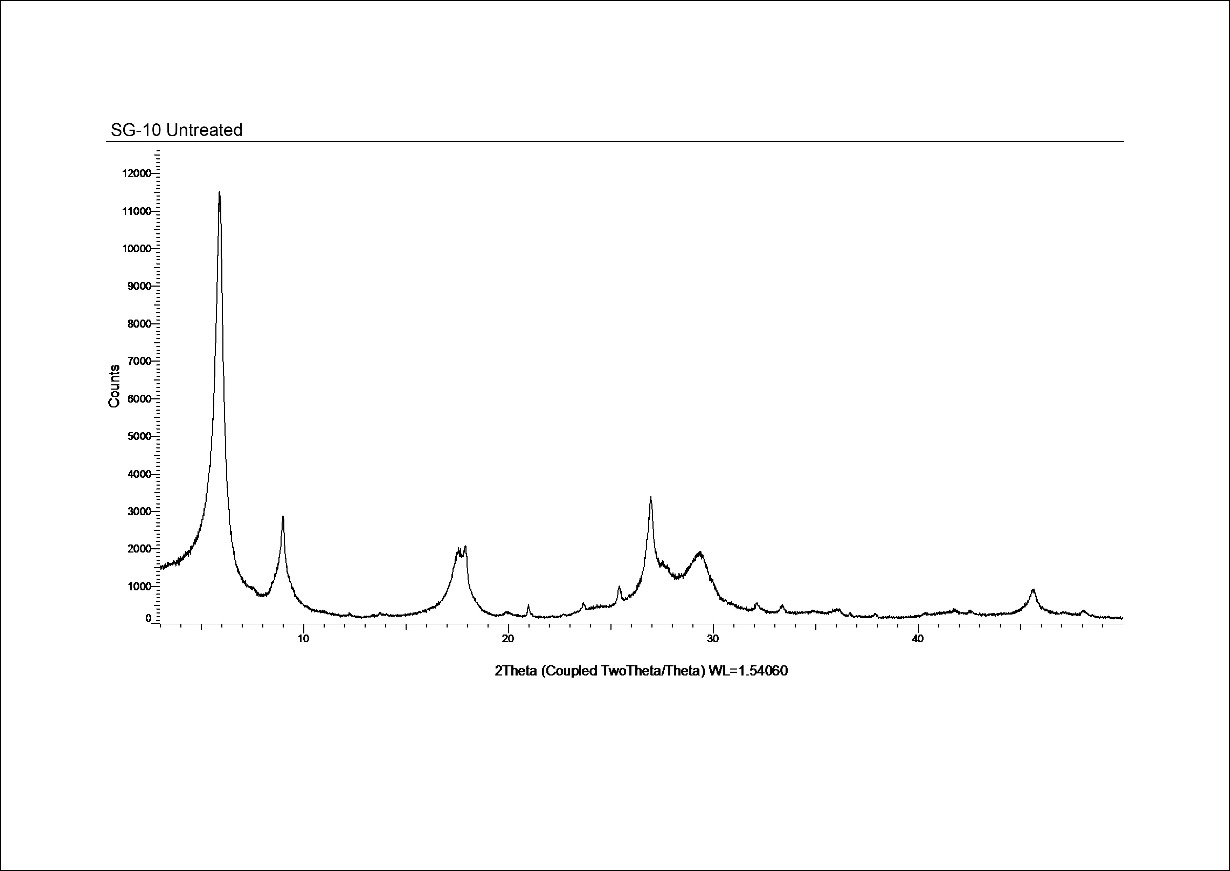


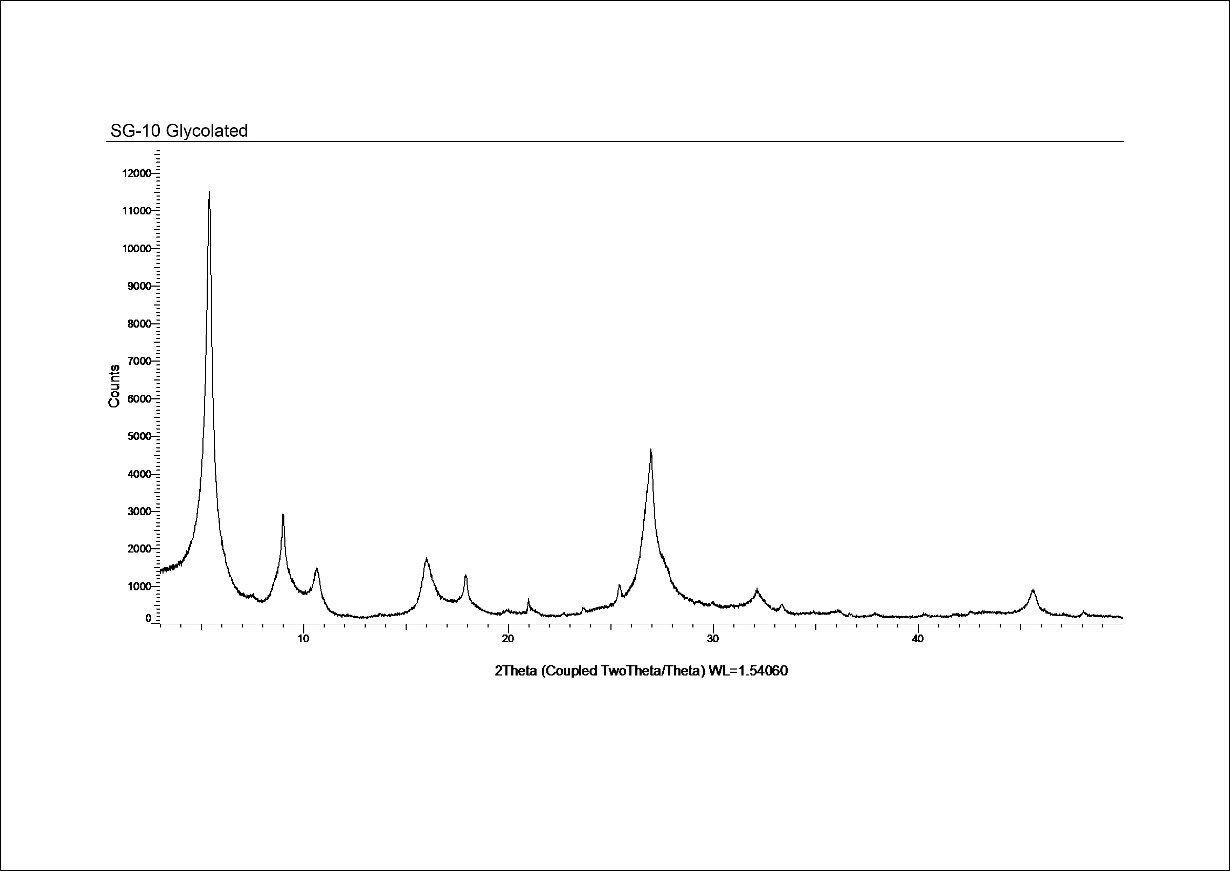


­­­
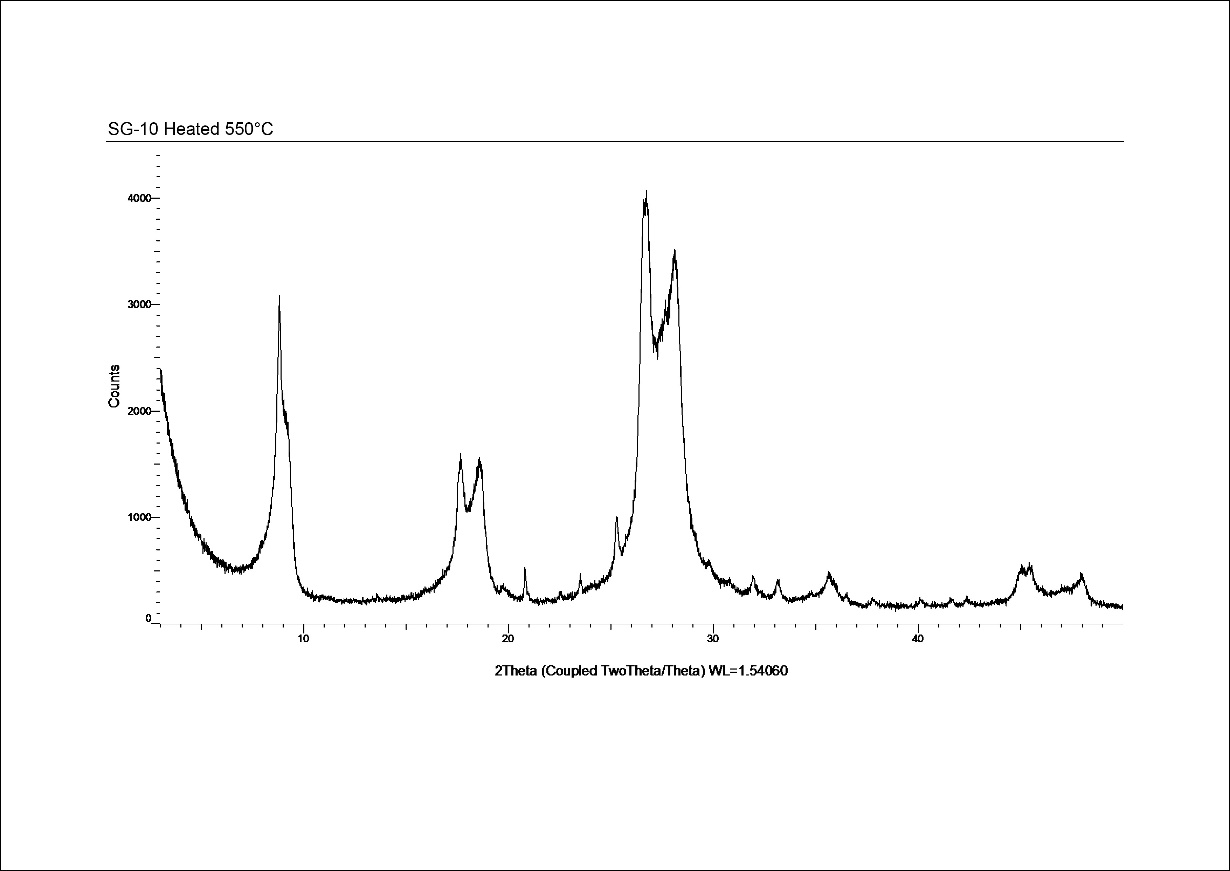

Supplement: Supplementary file 1 [file 13574357]
